# Supplementary material
Source: PubMed Central journal article supplement (PMC9545809)
Supplement: Supp_Fig1.pdf [file Supp_Fig1.pdf]

## Supplementary Data

Fig 1B

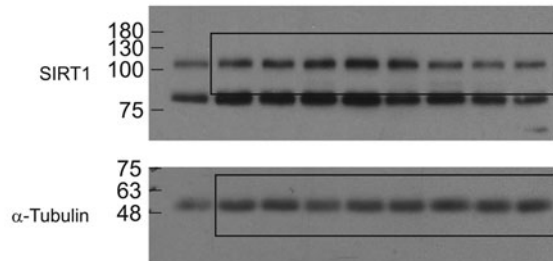

\*

**SUPPLEMENTARY FIG. S1. Original full WBs corresponding to data shown in Figure 1. (Fig. 1B)** Full WBs corresponding to SIRT1 levels in the liver of APAP-treated mice and  $\alpha$ -Tubulin used as loading control. APAP, acetaminophen; SIRT1, sirtuin 1; WB, Western blot.
