# Supplementary material
Source: PubMed Central journal article supplement (PMC9545809)
Supplement: Supp_Fig2.pdf [file Supp_Fig2.pdf]

Fig 2A

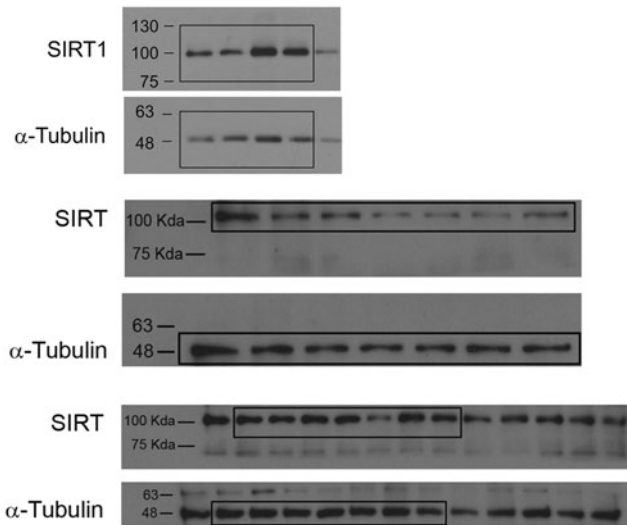

**SUPPLEMENTARY FIG. S2. Original full WBs corresponding to data shown in Figure 2. (Fig. 2A)** Full WBs from the *left panel* corresponding to SIRT1 protein levels in livers from SIRT1-WT and SIRT1-Tg mice and  $\alpha$ -Tubulin used as loading control. Full WBs from the *right panel* corresponding to SIRT1 levels in livers from control (vehicle) or APAP-injected SIRT1-WT and SIRT1-Tg mice and full WBs of  $\alpha$ -Tubulin used as loading control.
