# Supplementary material
Source: PubMed Central journal article supplement (PMC9545809)
Supplement: Supp_Fig3.pdf [file Supp_Fig3.pdf]

Fig 3B

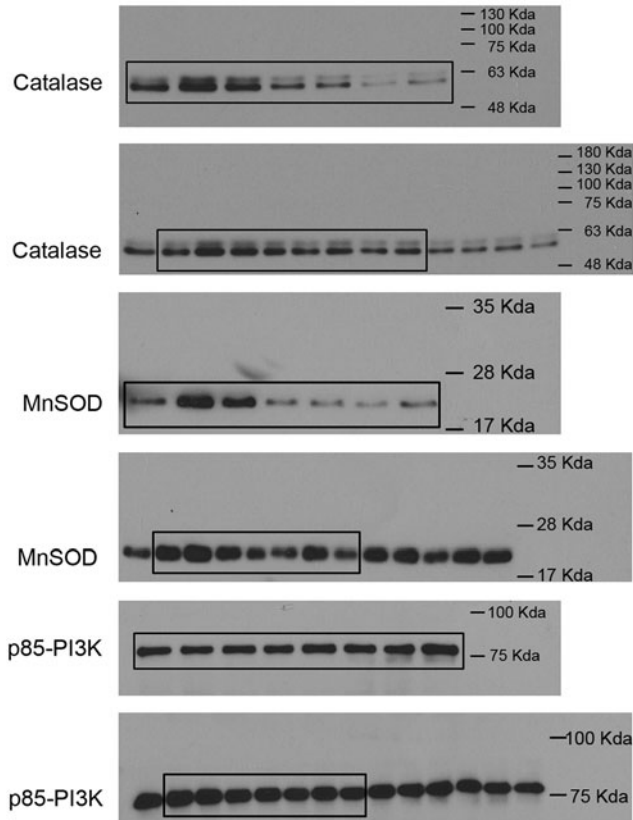

Fig 3C

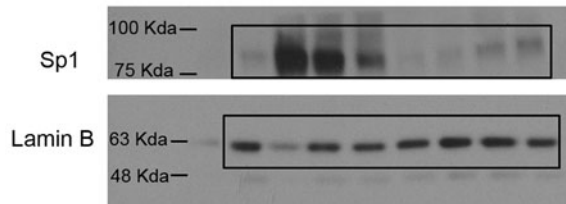

**SUPPLEMENTARY FIG. S3. Original full WBs corresponding to data shown in Figure 3. (Fig. 3B)** Full WBs corresponding to catalase and MnSOD protein levels in livers from control (vehicle) or APAP-injected SIRT1-WT and SIRT1-Tg mice. Full WBs corresponding to p85 $\alpha$ -PI3K used as loading control. **(Fig. 3C)** Full WBs corresponding to nuclear SP1 levels in livers from control (vehicle) or APAP-injected SIRT1-WT and SIRT1-Tg mice. Full WBs corresponding to Lamin B used as loading control. MnSOD, manganese superoxide dismutase.
