# Supplementary material
Source: PubMed Central journal article supplement (PMC9545809)
Supplement: Supp_Fig4.pdf [file Supp_Fig4.pdf]

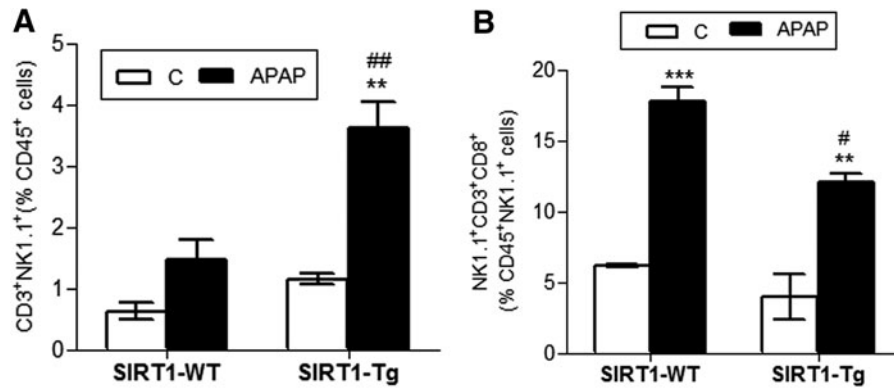

**SUPPLEMENTARY FIG. S4. Differential effects on cytotoxic NKT in SIRT1-WT and SIRT1-Tg mice after 3 h of APAP treatment.** Overnight fasted SIRT1-WT and SIRT1-Tg mice were i.p. injected physiological saline (vehicle) or 300 mg/kg APAP. Mice were sacrificed after 3 h, as indicated, and NPCs were isolated and analyzed by flow cytometry. **(A)** Analysis of NKT (CD3<sup>+</sup> and NK1.1<sup>+</sup> cells on CD45<sup>+</sup> pregated cells). Values are mean ± SEM. Statistical analysis was performed by one-way ANOVA followed by Bonferroni *post hoc* test. \*\**p* < 0.01 versus control (vehicle) condition. ##*p* < 0.01 versus SIRT1-WT mice. **(B)** Study of cytotoxic NKT (CD3<sup>+</sup> and CD8<sup>+</sup> cells on CD45<sup>+</sup> and NK1.1<sup>+</sup> pregated cells). Values are mean ± SEM. Statistical analysis was performed by one-way ANOVA followed by Bonferroni *post hoc* test. \*\**p* < 0.01, \*\*\**p* < 0.001 versus control (vehicle) condition, #*p* < 0.05 versus SIRT1-WT mice. ANOVA, analysis of variance; i.p., intraperitoneal; NKT, natural killer T; SEM, standard error of the mean.
