# Supplementary material
Source: PubMed Central journal article supplement (PMC9545809)
Supplement: Supp_Fig5.pdf [file Supp_Fig5.pdf]

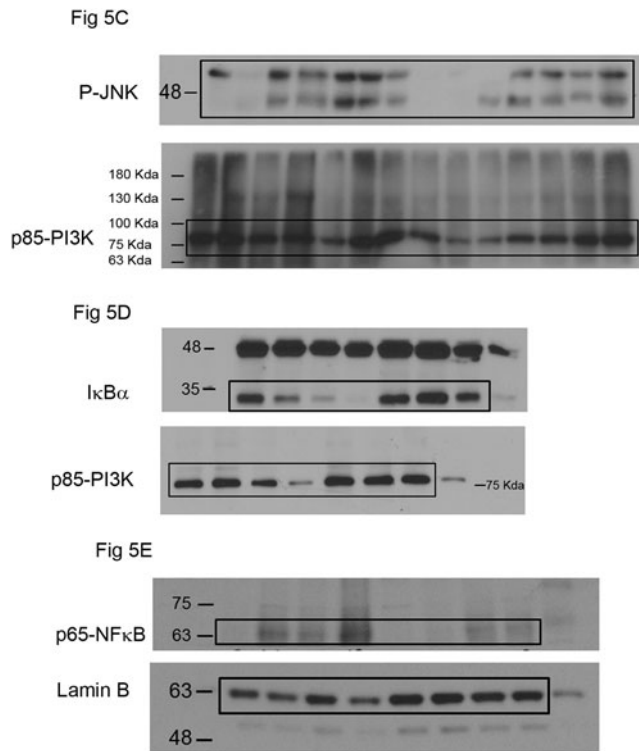

**SUPPLEMENTARY FIG. S5. Original full WBs corresponding to data shown in Figure 5. (Fig. 5C)** Full WBs corresponding to phosphorylated JNK protein levels in livers from control (vehicle) or APAP-treated SIRT1-WT and SIRT1-Tg mice. Full WBs corresponding to p85-PI3K used as loading control. **(Fig. 5D)** Full WBs corresponding to IκBα levels in livers from control (vehicle) or APAP-treated SIRT1-WT and SIRT1-Tg mice. Full WBs corresponding to p85-PI3K used as loading control. **(Fig. 5E)** Full WBs corresponding to nuclear p65-NFκB protein levels in livers from control (vehicle) or APAP-treated SIRT1-WT and SIRT1-Tg mice. Full WBs corresponding to Lamin B used as loading control in nuclear extracts. IκBα, inhibitor of kappa B alpha; JNK, c-Jun N-terminal kinase; NFκB, nuclear factor kappa B.
