# Supplementary material
Source: PubMed Central journal article supplement (PMC9545809)
Supplement: Supp_Fig6.pdf [file Supp_Fig6.pdf]

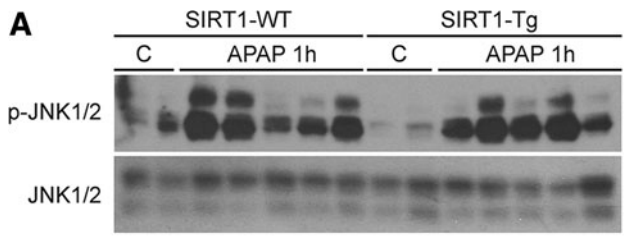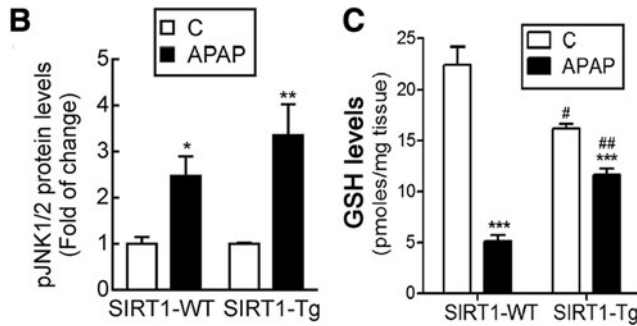

**SUPPLEMENTARY FIG. S6. One hour of APAP intoxication did not affect JNK phosphorylation, but differentially depleted GSH in SIRT1-WT and SIRT1-Tg mice.** (A) Representative immunoblots showing phospho-JNK and total JNK as a loading control. (B) After quantification of all blots, results are expressed as fold change relative to control (vehicle) condition and are mean  $\pm$  SEM. Statistical analysis was performed by two-way ANOVA followed by Bonferroni *post hoc* test. \* $p < 0.05$ , \*\* $p < 0.01$  versus control (vehicle) condition.  $n = 5-6$  mice per group. (C) Reduced GSH levels were analyzed in livers from SIRT1-WT and SIRT1-Tg mice treated with APAP for 1 h. Values are mean  $\pm$  SEM. Statistical analysis was performed by two-way ANOVA followed by Bonferroni *post hoc* test. \*\*\* $p < 0.001$  versus each control (vehicle) condition. # $p < 0.05$ , ## $p < 0.01$  versus SIRT1-WT mice.  $n = 5-6$  mice per group. GSH, glutathione.
