# Supplementary material
Source: PubMed Central journal article supplement (PMC9545809)
Supplement: Supp_Fig7.pdf [file Supp_Fig7.pdf]

SuppFig6A

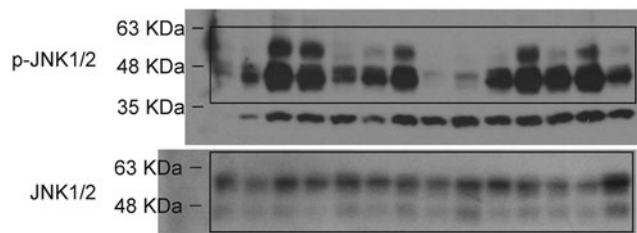

**SUPPLEMENTARY FIG. S7. Original full WBs corresponding to data shown in Supplementary Figure S6. (Supplementary Fig. S6)** Full WBs corresponding to phosphorylated JNK and total JNK protein levels in livers from control (vehicle) or APAP-treated SIRT1-WT and SIRT1-Tg mice during 1 h.
