# Supplementary material
Source: PubMed Central journal article supplement (PMC9545809)
Supplement: Supp_Fig9.pdf [file Supp_Fig9.pdf]

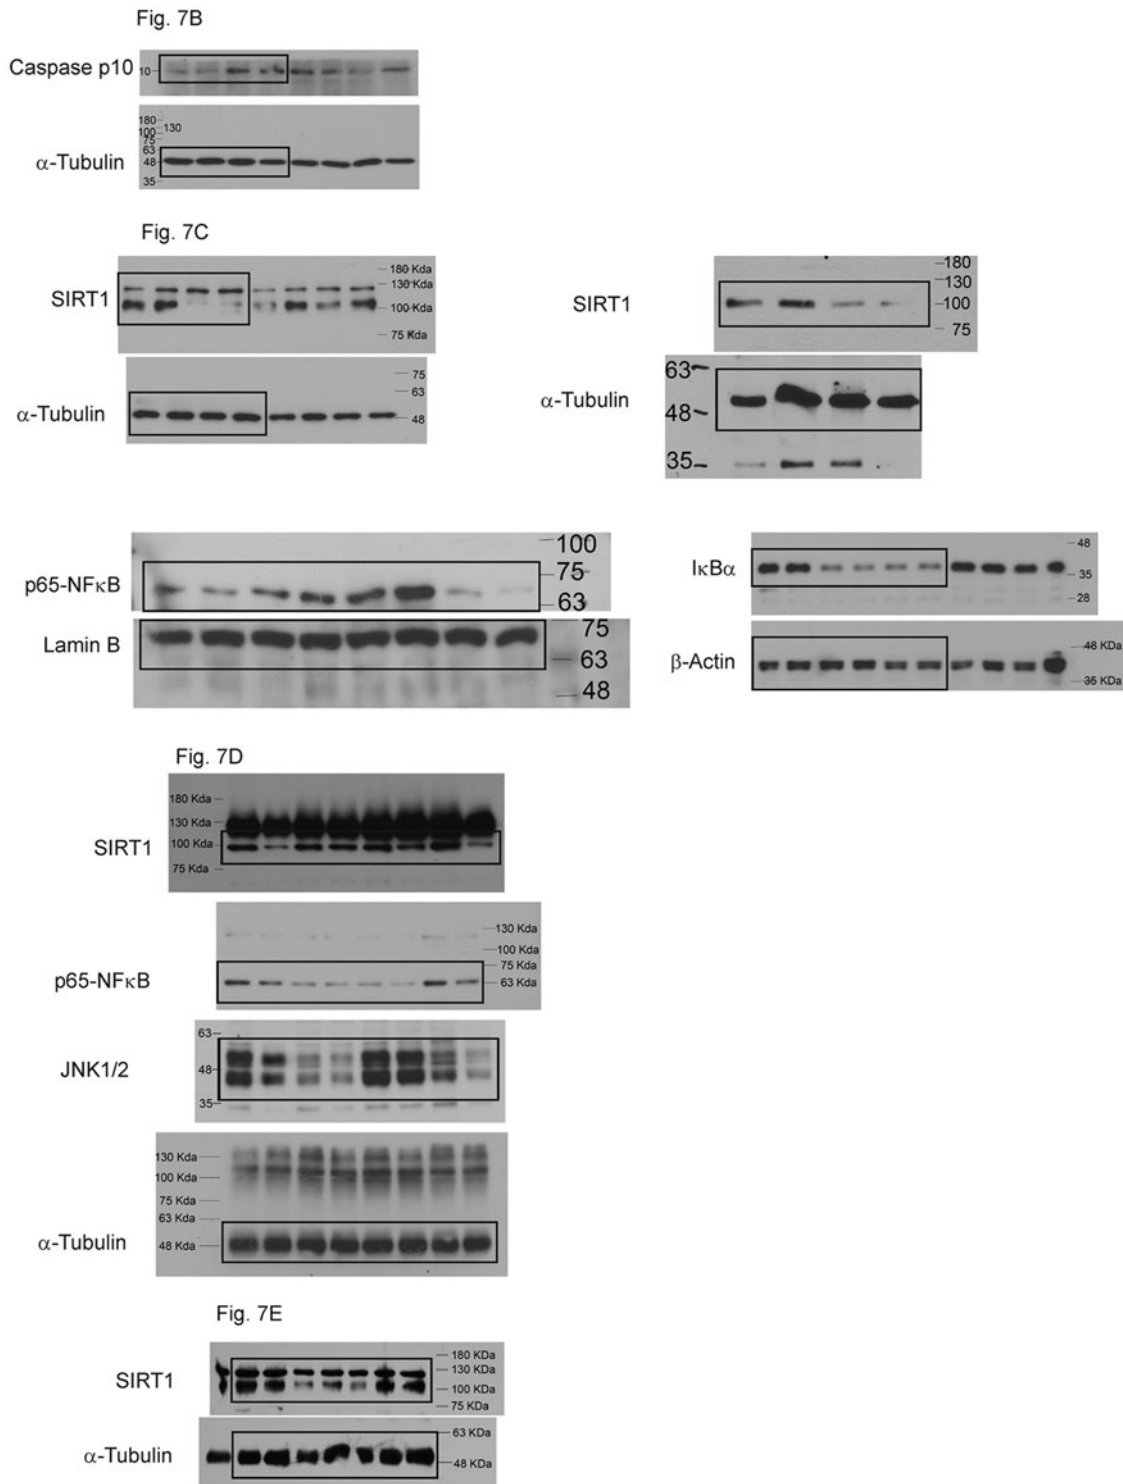

**SUPPLEMENTARY FIG. S9. Original full WBs corresponding to data shown in Figure 7. (Fig. 7B)** Full WBs corresponding to the active fragment of caspase-1 (p10) detected in RAW 264.7 macrophages stimulated with APAP. **(Fig. 7C)** (Upper panels) Full WBs corresponding to SIRT1 levels detected in protein extracts from mouse hepatocytes (left) or human primary hepatocytes (right) treated with or without IL1 $\beta$ . (Lower panels) Full WBs corresponding to nuclear p65-NF $\kappa$ B in nuclear protein extracts from mouse hepatocytes treated with IL1 $\beta$  at time periods indicated in the figure legend. Full WBs corresponding to nuclear Lamin B used as loading control. Full WBs corresponding to I $\kappa$ B $\alpha$  in total protein extracts from mouse hepatocytes treated with IL1 $\beta$  at time periods indicated in the figure legend. Full WBs corresponding to  $\beta$ -Actin levels used as loading control. **(Fig. 7D)** Full WBs corresponding to SIRT1, p65-NF $\kappa$ B, and JNK1/2 protein levels in mouse hepatocytes under the experimental conditions indicated in the figure legend. Full WBs corresponding to  $\alpha$ -Tubulin levels used as loading control. **(Fig. 7E)** Full WBs corresponding to SIRT1 protein levels in mouse hepatocytes under the experimental conditions indicated in the figure legend. Full WBs corresponding to  $\alpha$ -Tubulin levels used as loading control. IL, interleukin.
