# Supplementary material
Source: PubMed Central journal article supplement (PMC9545809)
Supplement: Supp_Fig10.pdf [file Supp_Fig10.pdf]

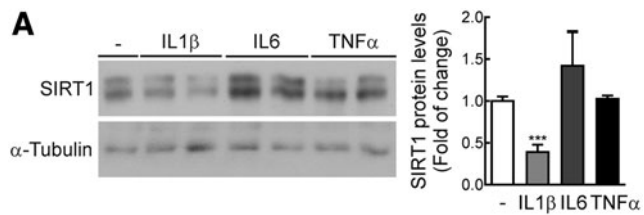

**SUPPLEMENTARY FIG. S10. IL6 or TNF $\alpha$  treatment did not decrease SIRT1 protein levels in hepatocytes. (A)** Hepatocytes were treated with recombinant IL1 $\beta$  (20 ng/ml), IL6 (20 ng/ml), or TNF $\alpha$  (50 ng/ml) for 16 h, and then, SIRT1 protein levels were analyzed by WB. After quantification of all blots, results are expressed as fold change relative to untreated hepatocytes and are mean  $\pm$  SEM. Statistical analysis was performed by one-way ANOVA followed by Newman–Keuls multiple comparison test. \*\*\* $p < 0.001$  versus untreated hepatocytes. TNF $\alpha$ , tumor necrosis factor alpha.
