# Supplementary material
Source: PubMed Central journal article supplement (PMC9545809)
Supplement: Supp_Fig11.pdf [file Supp_Fig11.pdf]

Supp Fig 10A

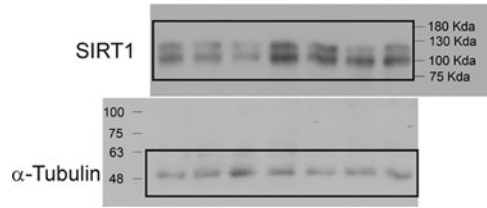

**SUPPLEMENTARY FIG. S11. Original full WBs corresponding to data shown in Supplementary Figure S10. (Supplementary Fig. S10A)** Full WBs of SIRT1 protein levels in mouse hepatocytes treated as described in the figure legend. Full WBs corresponding to  $\alpha$ -Tubulin levels used as loading control.
