# Supplementary material
Source: PubMed Central journal article supplement (PMC9545809)
Supplement: Supp_Fig12.pdf [file Supp_Fig12.pdf]

Fig 8A

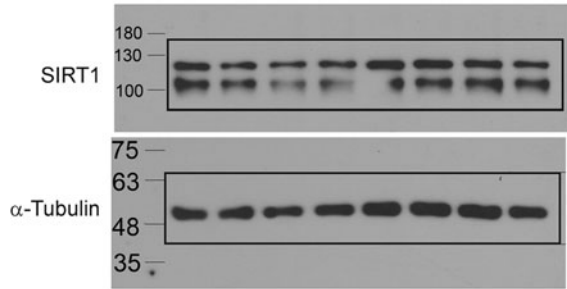

Fig 8B

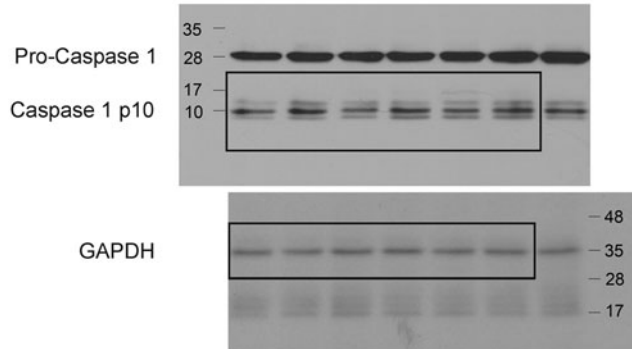

**SUPPLEMENTARY FIG. S12. Original full WBs corresponding to data shown in Figure 8. (Fig. 8A)** Full WBs corresponding to SIRT1 levels in primary mouse hepatocytes treated with conditioned medium from peritoneal macrophages treated with vehicle or APAP. Full WBs corresponding to  $\alpha$ -Tubulin levels used as loading control. **(Fig. 8B)** Full WBs corresponding to levels of procaspase and the active fragment of caspase-1 (p10) detected in peritoneal macrophages from SIRT1-WT and SIRT1-Tg mice stimulated with APAP. Full WBs of GAPDH used as loading control. GAPDH, glyceraldehyde-3-phosphate dehydrogenase.
