# Supplementary material
Source: PubMed Central journal article supplement (PMC9545809)
Supplement: Supp_Fig13.pdf [file Supp_Fig13.pdf]

Fig 9A

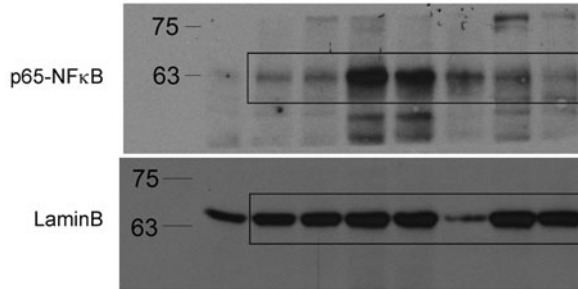

Fig 9D

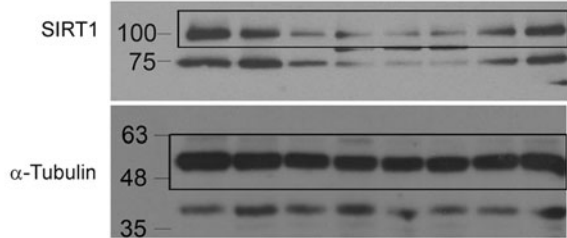

Fig 9G

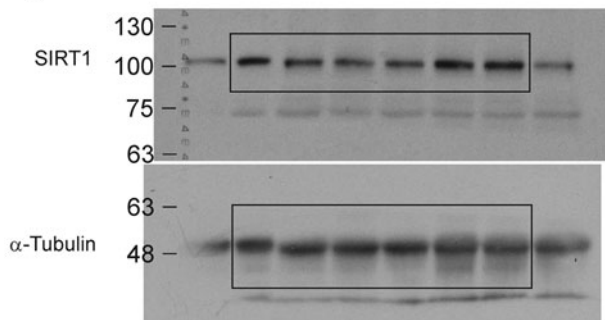

**SUPPLEMENTARY FIG. S13. Original full WBs corresponding to data shown in Figure 9. (Fig. 9A)** Full WBs corresponding to nuclear NFκB levels or Lamin B used as loading control in livers of wild-type mice treated with APAP or injected with BAY11-7082 1 h prior APAP intoxication. **(Fig. 9D)** Full WBs corresponding to total SIRT1 levels or α-Tubulin used as loading control in livers of wild-type mice treated with APAP or injected with BAY11-7082 1 h prior APAP intoxication. **(Fig. 9G)** Full WBs corresponding to total SIRT1 levels or α-Tubulin used as loading control in livers of wild-type mice treated with APAP or injected with BAY11-7082 1 h after APAP intoxication.
